# Supplementary material
Source: HighWire-hosted journal article supplement (https://www.cmaj.ca/highwire/filestream/59252/field_highwire_adjunct_files/7/three-parshuram-8-at.pdf)
Supplement: three-parshuram-8-at.pdf [file three-parshuram-8-at.pdf]

## Appendix 8 (as supplied by the authors): ICU Staff Survey Respondents

|                                                                                                                                                                                                                                     |       | All         | 24 hour night | 16 hour night | 12 hour night | P value |
|-------------------------------------------------------------------------------------------------------------------------------------------------------------------------------------------------------------------------------------|-------|-------------|---------------|---------------|---------------|---------|
| <b>Respondents</b>                                                                                                                                                                                                                  | N (%) | 452 (100%)  | 160           | 128           | 164           |         |
| <b>Professional Background</b>                                                                                                                                                                                                      |       |             |               |               |               | 0.75    |
| ICU Nurses                                                                                                                                                                                                                          | N (%) | 302 (66.8%) | 106 (66.3%)   | 91 (71.2%)    | 105 (64.0%)   |         |
| Respiratory Therapists                                                                                                                                                                                                              | N (%) | 58 (12.8%)  | 19 (11.9%)    | 12 (9.4%)     | 27 (16.5%)    |         |
| Physicians                                                                                                                                                                                                                          | N (%) | 37 (8.2%)   | 14 (8.8%)     | 8 (6.3%)      | 15 (9.15%)    |         |
| Pharmacists & Others                                                                                                                                                                                                                | N (%) | 55 (13.2)   | 21 (13.1%)    | 17 (13.3%)    | 17 (10.4%)    |         |
| <b>Clinical Role</b>                                                                                                                                                                                                                |       |             |               |               |               |         |
| Administrative                                                                                                                                                                                                                      | N (%) | 21 (4.7%)   | 8 (5.0%)      | 6 (4.7%)      | 7 (4.3%)      | 0.96    |
| Frontline                                                                                                                                                                                                                           | N (%) | 428 (95.3%) | 151 (95.0%)   | 122 (95.3%)   | 155 (95.7%)   |         |
| <b>Years Experience</b>                                                                                                                                                                                                             |       |             |               |               |               |         |
| 5 or less years                                                                                                                                                                                                                     | N (%) | 144 (32.3%) | 48 (30.4%)    | 49 (38.6%)    | 47 (29.2%)    | 0.2     |
| More than 5 years                                                                                                                                                                                                                   | N (%) | 302 (67.7%) | 110 (69.6%)   | 78 (61.4%)    | 114 (70.8%)   |         |
| Respondents of a survey administered to ICU staff at the end of each 2-month rotation. Up to 320 ICU staff were available to complete surveys. Comparisons using Chi squared indicate respondents were not significantly different. |       |             |               |               |               |         |
